# Supplementary material
Source: MDPI journal article supplement (https://www.mdpi.com/1999-4907/14/2/251)
Supplement: s1 [file s1]

**Table S1.** The analyzed FMPs from management units which previously overlapped on the current area of N2000-RG

| Section*                | Forest district (FD)    | Forest management unit (FMU)   | FMP's validity period | Analyzed?     |
|-------------------------|-------------------------|--------------------------------|-----------------------|---------------|
| Slătioara               | Stulpicani              | IX Slătioara                   | 1941-1950             | Not available |
|                         | MUFB Suha               | IX Slătioara                   | 1950-1955             | Yes           |
|                         | MUFB Suha               | IX Slătioara                   | 1955-1969             | Yes           |
|                         | Stulpicani              | VIII Slătioara                 | 1969-1980             | Yes           |
|                         | Stulpicani              | VIII Slătioara                 | 1980-1990             | Yes           |
|                         | Stulpicani              | VIII Slătioara                 | 1990-2001             | Yes           |
|                         | Stulpicani              | VIII Slătioara                 | 2001-2006             | Yes           |
|                         | Stulpicani              | VIII Slătioara                 | 2006-2015             | Yes           |
|                         | Stulpicani              | VIII Slătioara                 | 2016-2025             | Yes           |
| Chiril-Pietrele Doamnei | Crucea                  | -                              | 1938-1948             | Not available |
|                         | MUFB Broșteni           | XVII Chiril – Pietrele Doamnei | 1948-1960             | Yes           |
|                         | BARNAR                  | IX Chiril – Pietrele Doamnei   | 1960-1968             | Yes           |
|                         | Crucea                  | VI Chiril                      | 1968-1978             | Yes           |
|                         | Crucea                  | VI Chiril                      | 1978-1990             | Yes           |
|                         | Crucea                  | VI Chiril                      | 1990-2000             | Yes           |
|                         | Crucea                  | VI Chiril                      | 2000-2010             | Yes           |
|                         | Crucea                  | VI Chiril                      | 2010-2020             | Yes           |
| Rarău                   | Pojorâta                | I Rarău                        | Before 1962           | Not available |
|                         | Pojorâta                | I Rarău                        | 1962-1972             | Yes           |
|                         | Pojorâta                | I Rarău                        | 1972-1983             | Yes           |
|                         | Pojorâta                | I Rarău                        | 1983-1994             | Yes           |
|                         | Pojorâta                | I Rarău                        | 1994-2004             | Yes           |
|                         | Pojorâta                | I Rarău                        | 2004-2014             | Yes           |
|                         | Pojorâta                | I Rarău                        | 2014-2024             | Yes           |
| Giumalău                | Pojorâta                | II Giumalău                    | 1941-1950             | Not available |
|                         | MUFB Moldova superioară | III Putna                      | 1950-1962             | Yes           |
|                         | Pojorâta                | III Valea Putnei               | 1962-1972             | Yes           |
|                         | Pojorâta                | III Valea Putnei               | 1972-1983             | Yes           |
|                         | Pojorâta                | III Valea Putnei               | 1983-1994             | Yes           |
|                         | Pojorâta                | III Valea Putnei               | 1994-2004             | Yes           |
|                         | Pojorâta                | III Valea Putnei               | 2004-2014             | Yes           |
|                         | Pojorâta                | III Valea Putnei               | 2014-2024             | Yes           |

\* The Natura 2000 site ROSCI0212 Rarău-Giumalău currently overlaps on four Forest management units, from three different forest districts and the „Section” column indicates the part of the site belonging to different forest management units.

**Table S2.** Coefficients used for computing the tree aboveground wood volume [1]

| Tree Species (i)                  | Coefficients for Equation (2) |                |                |                |                |
|-----------------------------------|-------------------------------|----------------|----------------|----------------|----------------|
|                                   | a <sub>0</sub>                | a <sub>1</sub> | a <sub>2</sub> | a <sub>3</sub> | a <sub>4</sub> |
| <i>Acer pseudoplatanus</i> L.     | -4.06012                      | 1.81478        | 0.07283        | 0.76688        | 0.006155       |
| <i>Abies alba</i> Mill.           | -4.46414                      | 2.19479        | -0.12498       | 1.04645        | -0.016848      |
| <i>Betula pendula</i> Roth        | -4.16999                      | 2.27038        | -0.21540       | 0.30765        | 0.368258       |
| <i>Fagus sylvatica</i> L.         | -4.11122                      | 1.30216        | 0.23636        | 1.26562        | -0.079661      |
| <i>Larix decidua</i> Mill.        | -4.59667                      | 2.26066        | -0.13256       | 1.02582        | 0.007491       |
| <i>Populus tremula</i> L.         | -4.22131                      | 1.76256        | 0.05900        | 1.04105        | -0.009430      |
| <i>Picea abies</i> (L.) H. Karst. | -4.18161                      | 2.08131        | -0.11819       | 0.70119        | 0.148181       |
| <i>Pinus sylvestris</i> L.        | -3.84672                      | 1.82103        | -0.04107       | 0.35677        | 0.334910       |
| <i>Sorbus aucuparia</i> L.        | -4.31485                      | 2.58064        | -0.21693       | 0.55092        | 0.025773       |
| <i>Taxus baccata</i> L.           | -4.46414                      | 2.19479        | -0.12498       | 1.04645        | -0.016848      |
| <i>Ulmus glabra</i> Huds.         | -4.49118                      | 2.18244        | -0.10324       | 1.20293        | -0.124978      |

**Table S3.** Short overview on the history of protected forest areas from the reserves inside N2000-RG

| Name of reserve                |                  | Codrul secular<br>Giumalău | Codrul secular<br>Slătioara | Rarău – Pietrele<br>Doamnei                                           |
|--------------------------------|------------------|----------------------------|-----------------------------|-----------------------------------------------------------------------|
| Establishment                  | Year             | 1941                       | 1941                        | 1955                                                                  |
|                                | Area (ha)        | 290.62                     | 295.28                      | 258.51                                                                |
| 1 <sup>st</sup> area<br>change | Year             | 1950                       | 1950                        | 1972                                                                  |
|                                | SPA (ha)         | 281.65                     | 359.99                      | 301.6<br>(267.9 ha in FMU<br>VI Chiril, 33.7 ha in<br>FMU I Rarău)    |
|                                | Buffer area (ha) | -                          | 549.87                      | -                                                                     |
|                                | Source           | [2]                        | [3]                         | [4,5]                                                                 |
| 2 <sup>nd</sup> area<br>change | Year             | 1962                       | 1955                        | 1983                                                                  |
|                                | SPA (ha)         | 282.75                     | 313.65                      | 581.3<br>(257.5 in FMU VI<br>Chiril, 323.8 ha in<br>FMU I Rarău)      |
|                                | Buffer area (ha) | -                          | 527.09                      | -                                                                     |
|                                | Source           | [6]                        | [7]                         | [8,9]                                                                 |
| 3 <sup>rd</sup> area<br>change | Year             | 1972                       | 1969                        | 1994                                                                  |
|                                | SPA (ha)         | 314                        | 313.6                       | 539.6<br>(288.5 ha in FMU<br>VI Chiril, 251.1 ha<br>in FMU I Rarău)   |
|                                | Buffer area (ha) | -                          | 554.4                       | -                                                                     |
|                                | Source           | [10]                       | [11]                        | [12,13]                                                               |
| 4 <sup>th</sup> area<br>change | Year             | 1983                       | 1980                        | 2004                                                                  |
|                                | SPA (ha)         | 192,9                      | 311.6                       | 579.97<br>(288.2 ha in FMU<br>VI Chiril, 291.77 ha<br>in FMU I Rarău) |
|                                | Buffer area (ha) | 116,6                      | 746.1                       | -                                                                     |

|                             |                  |        |          |                                                                  |
|-----------------------------|------------------|--------|----------|------------------------------------------------------------------|
|                             | Source           | [14]   | [15]     | [16,17]                                                          |
|                             | Year             | 1994   | 1990     | 2014                                                             |
| 5 <sup>th</sup> area change | SPA (ha)         | 164,5  | 330.4    | 573.14<br>(281.37 ha in FMU VI Chiril, 291.77 ha in FMU I Rarău) |
|                             | Buffer area (ha) | 145,0  | 674.3    | -                                                                |
|                             | Source           | [18]   | [19]     | [17,20]                                                          |
|                             | Year             | 2004   | 2001     | 2020                                                             |
| 6 <sup>th</sup> area change | SPA (ha)         | 306,2  | 327.0    | 578.29<br>(286.52 ha in FMU VI Chiril, 291.77 ha in FMU I Rarău) |
|                             | Buffer area (ha) | -      | 554.7    | -                                                                |
|                             | Source           | [21]   | [22]     | [17,23]                                                          |
|                             | Year             | 2014   | 2006     |                                                                  |
| 7 <sup>th</sup> area change | SPA (ha)         | 338.81 | 1,044.8  |                                                                  |
|                             | Buffer area (ha) | -      | -        |                                                                  |
|                             | Source           | [24]   | [25]     |                                                                  |
|                             | Year             |        | 2016     |                                                                  |
| 8 <sup>th</sup> area change | SPA (ha)         |        | 1,044.72 |                                                                  |
|                             | Buffer area (ha) |        | -        |                                                                  |
|                             | Source           |        | [26]     |                                                                  |

SPA – strictly protected area.

## References

1. Giurgiu, V.; Drăghiciu, D. *Metode și tabele dendrometrice [Forest measuring methods and tables]*; Ceres Publishing House: Bucharest, 2004;
2. Anonymous *Forest Management Plan of Forest Management Unit III Putna, Moldova Superioară Forest District*; Bucharest, 1950;
3. Anonymous *Forest Management Plan of Forest Management Unit IX Slătioara, Suha Forest District*; Bucharest, 1950;
4. Anonymous *Forest Management Plan of Forest Management Unit VI Chiril, Crucea Forest District*; Bucharest, 1968;
5. Anonymous *Forest Management Plan of Forest Management Unit I Rarău, Pojorâta Forest District*; Bucharest, 1972;
6. Anonymous *Forest Management Plan of Forest Management Unit III Valea Putnei, Pojorâta Forest District*; Bucharest, 1962;
7. Anonymous *Forest Management Plan of Forest Management Unit IX Slătioara, Suha Forest District*; Bucharest, 1955;
8. Anonymous *Forest Management Plan of Forest Management Unit VI Chiril, Crucea Forest District*; Bucharest, 1978;
9. Anonymous *Forest Management Plan of Forest Management Unit I Rarău, Pojorâta Forest District*;

- Bucharest, 1983;
10. *Anonymous Forest Management Plan of Forest Management Unit III Valea Putnei, Pojorâta Forest District; Bucharest, 1972;*
  11. *Anonymous Forest Management Plan of Forest Management Unit VIII Slătioara, Stulpicani Forest District; Bucharest, 1969;*
  12. *Anonymous Forest Management Plan of Forest Management Unit VI Chiril, Crucea Forest District; Bucharest, 1990;*
  13. *Anonymous Forest Management Plan of Forest Management Unit I Rarău, Pojorâta Forest District; Bucharest, 1994;*
  14. *Anonymous Forest Management Plan of Forest Management Unit III Valea Putnei, Pojorâta Forest District; Bucharest, 1983;*
  15. *Anonymous Forest Management Plan of Forest Management Unit VIII Slătioara, Stulpicani Forest District; Bucharest, 1980;*
  16. *Anonymous Forest Management Plan of Forest Management Unit VI Chiril, Crucea Forest District; Bucharest, 2000;*
  17. *Anonymous Forest Management Plan of Forest Management Unit I Rarău, Pojorâta Forest District, Suceava State Forest Administration; ICAS, B. station, Ed.; 2014;*
  18. *Anonymous Forest Management Plan of Forest Management Unit III Valea Putnei, Pojorâta Forest District; Bucharest, 1994;*
  19. *Anonymous Forest Management Plan of Forest Management Unit VIII Slătioara, Stulpicani Forest District; Bucharest, 1990;*
  20. *Anonymous Forest Management Plan of Forest Management Unit VI Chiril, Crucea Forest District; Bucharest, 2010;*
  21. *Anonymous Forest Management Plan of Forest Management Unit III Valea Putnei, Pojorâta Forest District; Bucharest, 2004;*
  22. *Anonymous Forest Management Plan of Forest Management Unit VIII Slătioara, Stulpicani Forest District; Bucharest, 2001;*
  23. *Anonymous Forest Management Plan of Forest Management Unit VI Chiril, Crucea Forest District; Bucharest, 2020;*
  24. *Anonymous Forest Management Plan of Forest Management Unit III Valea Putnei, Pojorâta Forest District; Bucharest, 2014;*
  25. *Anonymous Forest Management Plan of Forest Management Unit VIII Slătioara, Stulpicani Forest District; Bucharest, 2006;*
  26. *Anonymous Forest Management Plan of Forest Management Unit VIII Slătioara, Stulpicani Forest District, Suceava State Forest Administration.; INCDS „Marin Drăcea”, B.S., Ed.; 2016;*
